# Supplementary material for: Selective photocatalytic aerobic oxidation of methane into carbon monoxide over Ag/AgCl@SiO2
Source: PubMed Central journal article supplement (PMC9020177; doi:10.1039/d2sc01140a), 2022-03-30
Supplement: SC-013-D2SC01140A-s001.pdf [file SC-013-D2SC01140A-s001.pdf]

## Supplementary Materials for

### **Selective photocatalytic aerobic oxidation of methane into carbon monoxide over Ag/AgCl@SiO<sub>2</sub>**

Jianxin Zhai, Baowen Zhou,\* Haihong Wu,\* Shuaiqiang Jia, Menggen Chu, Shitao Han, Wei Xia,  
Mingyuan He,\* Buxing Han\*

\*Corresponding author. Email: zhoubw@sjtu.edu.cn (B.W.Z.); hhwu@chem.ecnu.edu.cn (H.H.W.);  
Mingyuanhe@126.com (M.Y.H.); hanbx@iccas.ac.cn (B.X.H.).

**This file includes:**

- Fig. S1. The elemental mapping of Ag/AgCl.
- Fig. S2. EDS analysis of Ag/AgCl and Ag/AgCl@SiO<sub>2</sub>-4.1%.
- Fig. S3. XRD patterns for Ag/AgCl@SiO<sub>2</sub>-x.
- Fig. S4. XPS survey spectra of Ag/AgCl@SiO<sub>2</sub>-4.1%.
- Fig. S5. Light wavelength dependence of yields of CO on the light absorption spectrum of Ag/AgCl@SiO<sub>2</sub>-4.1% photocatalyst.
- Fig. S6. N<sub>2</sub> adsorption-desorption isotherms of Ag/AgCl@SiO<sub>2</sub>-x.
- Fig. S7. Photograph of the semi in-situ IR analysis apparatus.
- Fig. S8. FTIR spectra of gaseous phase during methane photocatalytic oxidation over the Ag/AgCl@SiO<sub>2</sub>-4.1% catalyst as a function of reaction time.
- Fig. S9. In situ ESR spectra of Ag/AgCl@SiO<sub>2</sub>-4.1% in the presence of TEMP.
- Table S1. ICP - OES analysis of Ag/AgCl@SiO<sub>2</sub>-x.

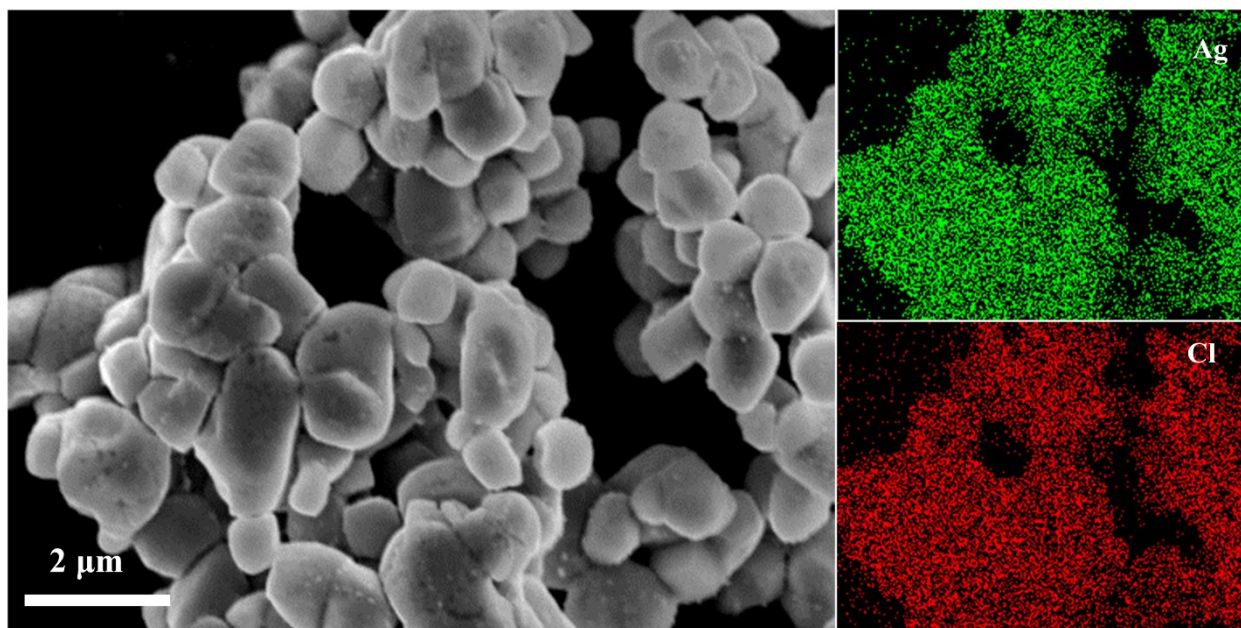

**Fig. S1.** The elemental mapping of Ag/AgCl.

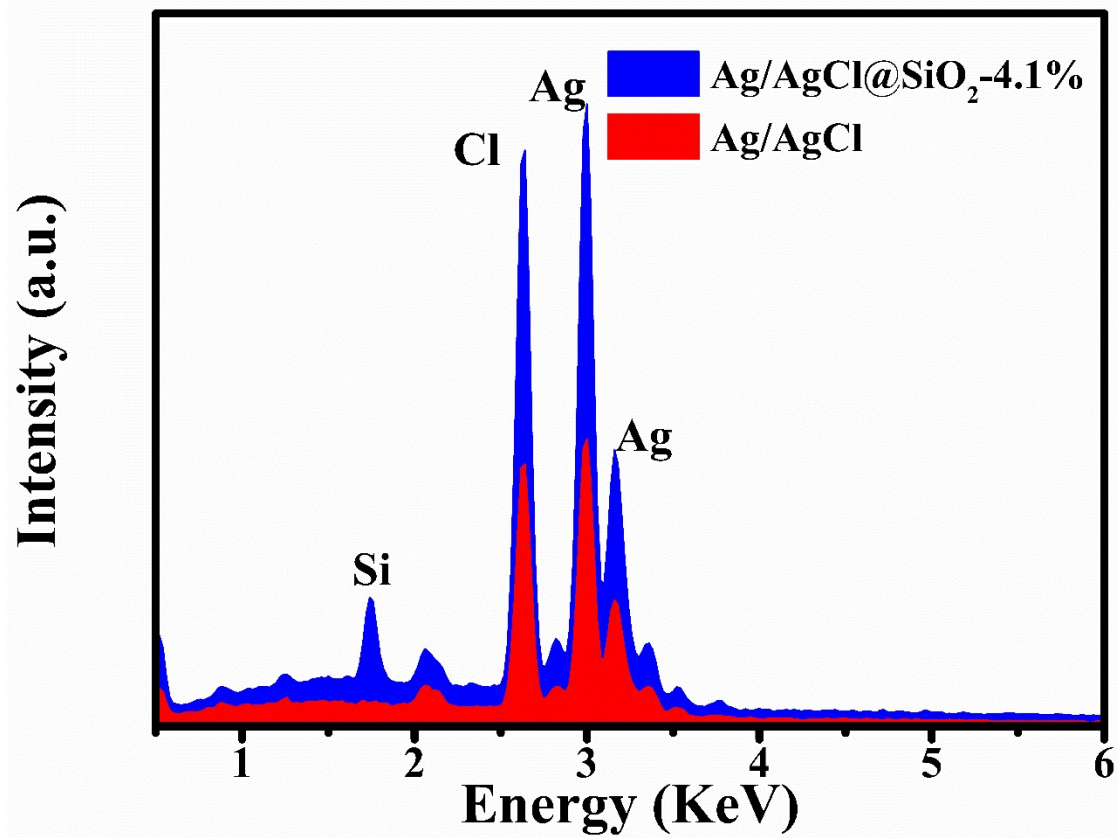

Fig. S2. EDS analysis of Ag/AgCl and Ag/AgCl@SiO<sub>2</sub>-4.1%.

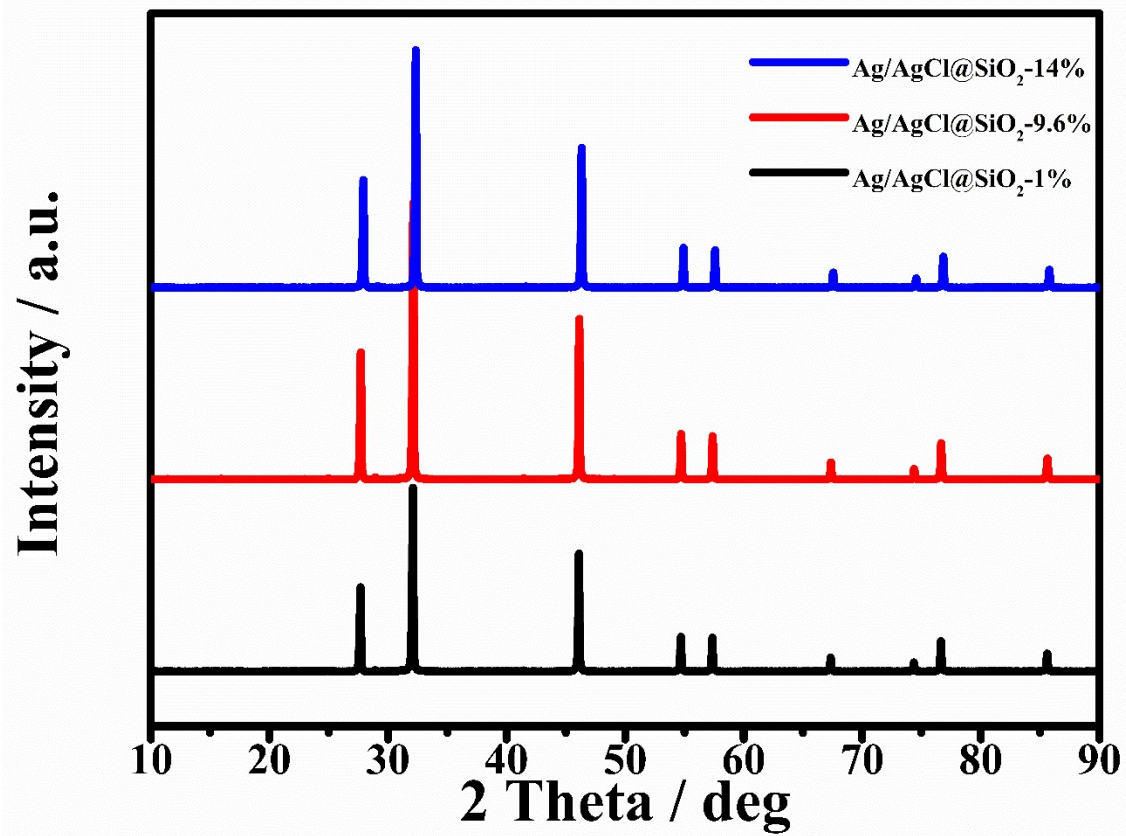

Fig. S3. XRD patterns for Ag/AgCl@SiO<sub>2</sub>-x.

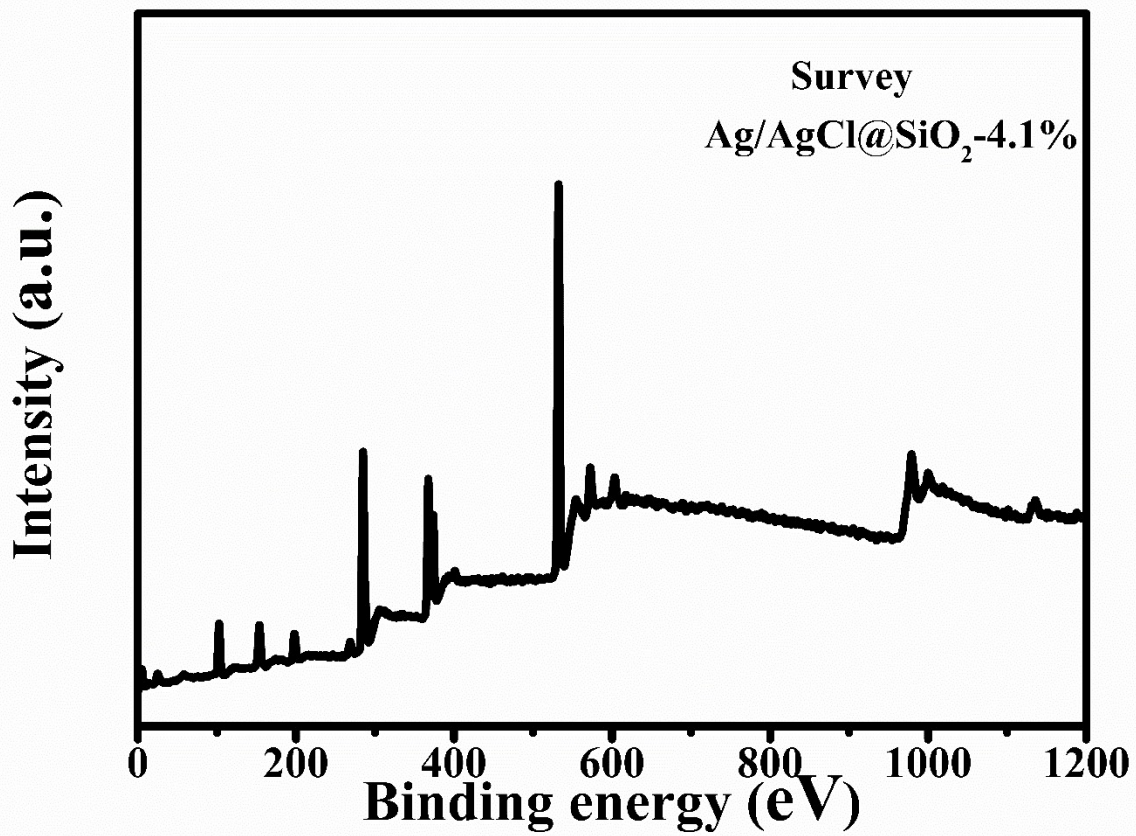

Fig. S4. XPS survey spectrum of Ag/AgCl@SiO<sub>2</sub>-4.1%.

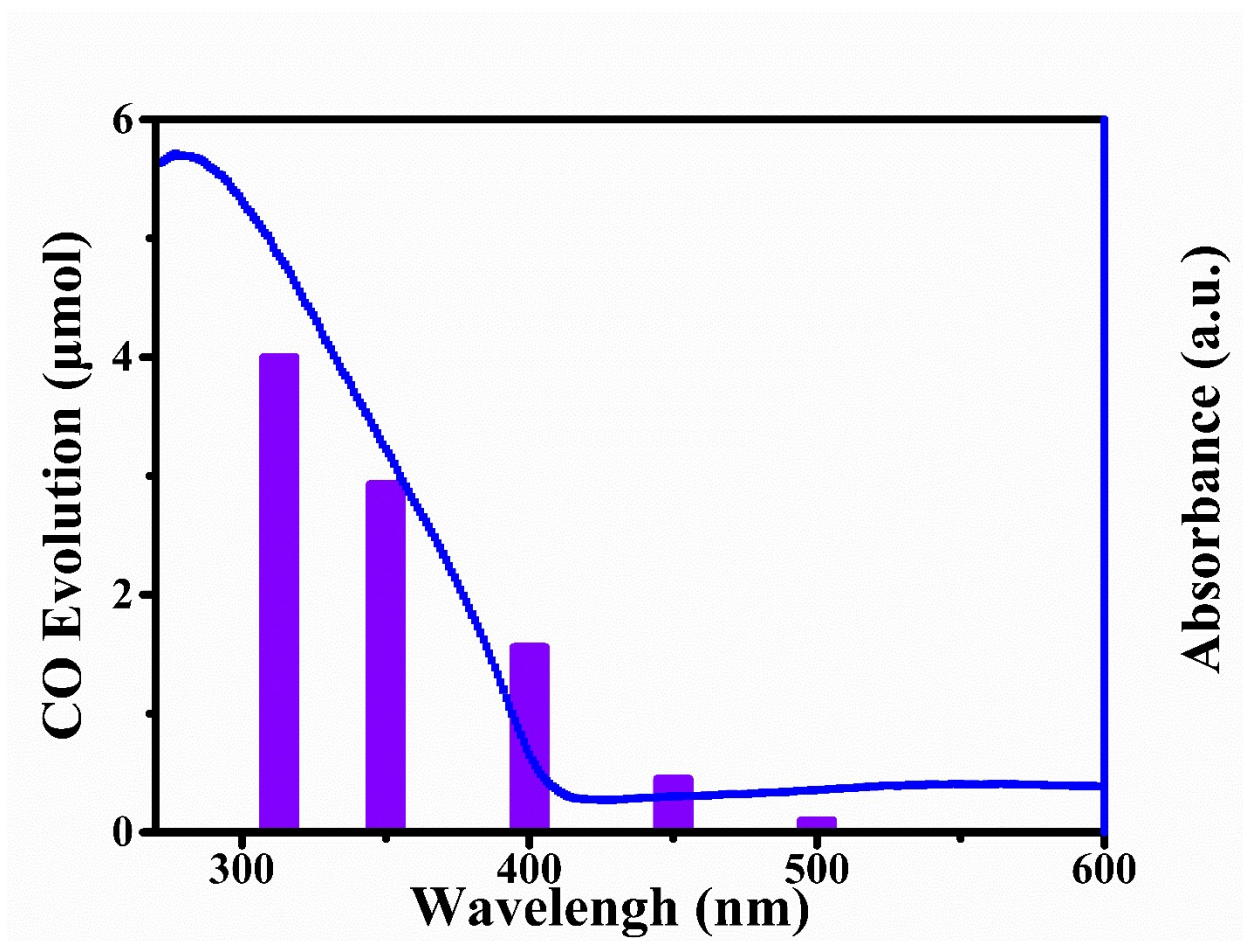

Fig. S5. Light wavelength dependence of yields of CO on the light absorption spectrum of Ag/AgCl@SiO<sub>2</sub>-4.1% photocatalyst.

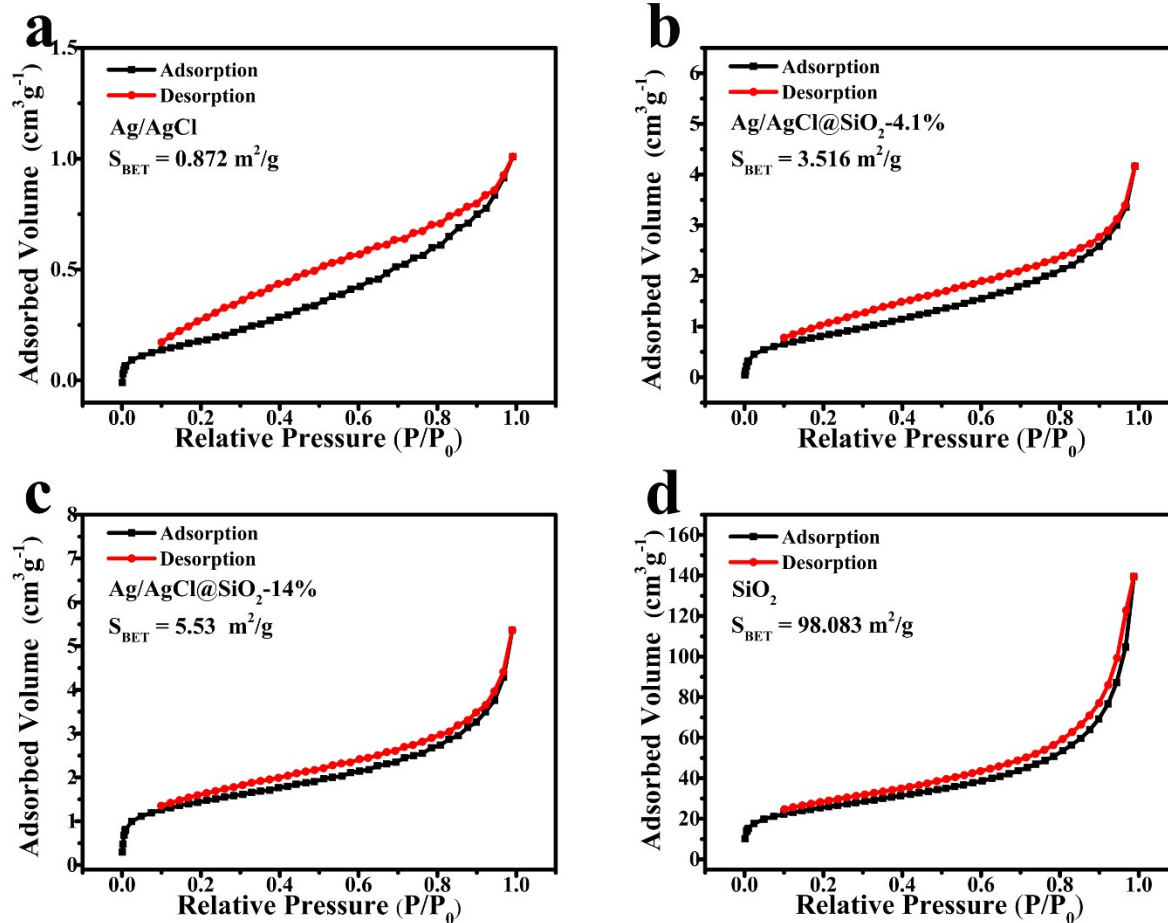

Fig. S6. N<sub>2</sub> adsorption-desorption isotherms of Ag/AgCl@SiO<sub>2</sub>-x.



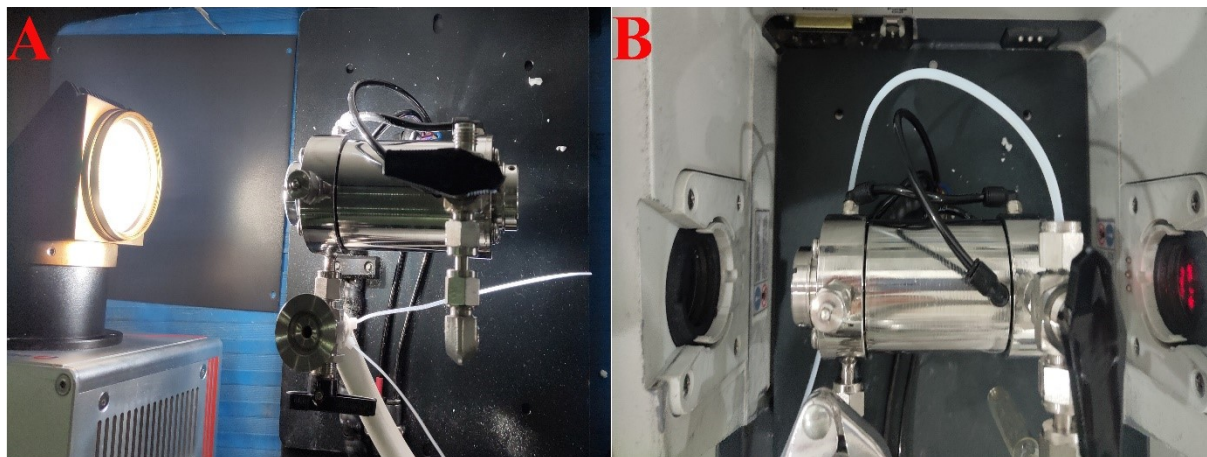

**Fig. S7. Photograph of the semi in-situ IR analysis apparatus.**

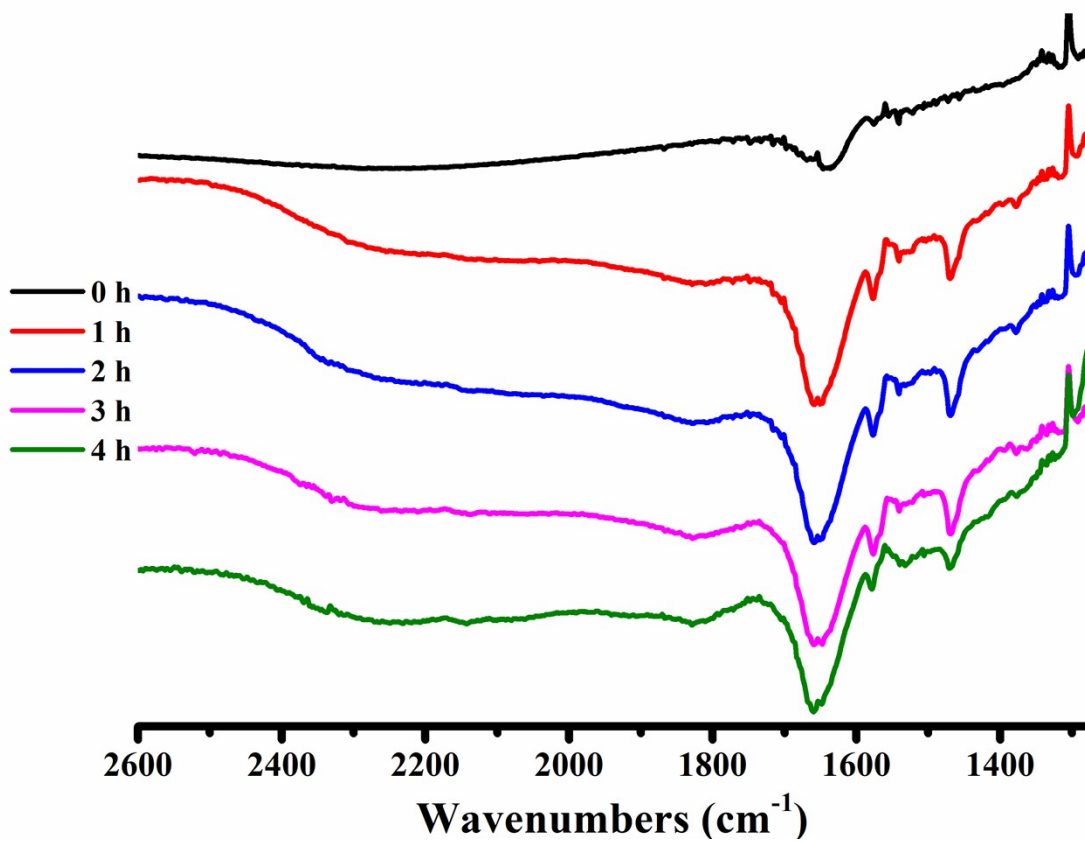

**Fig. S8.** FTIR spectra of gaseous phase during methane photocatalytic oxidation over the Ag/AgCl@SiO<sub>2</sub>-4.1% catalyst as a function of reaction time.

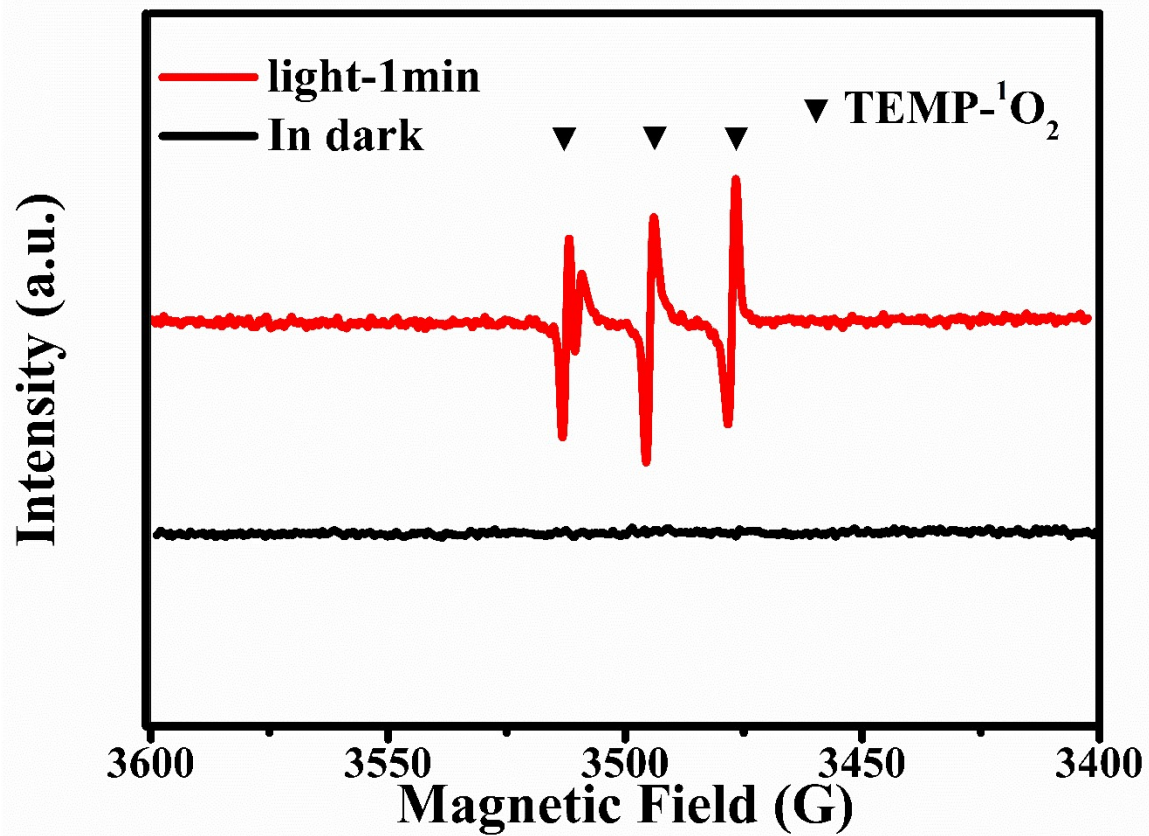

Fig. S9. In situ ESR spectra of Ag/AgCl@SiO<sub>2</sub>-4.1% in the presence of TEMP

**Table S1. ICP - OES analysis of Ag/AgCl@SiO<sub>2</sub>-x.**

| Catalyst                       | The volume of TEOS addition (mL) | Si (wt%) |
|--------------------------------|----------------------------------|----------|
| Ag/AgCl@SiO <sub>2</sub> -1%   | 0.05                             | 0.5      |
| Ag/AgCl@SiO <sub>2</sub> -4.1% | 0.1                              | 1.6      |
| Ag/AgCl@SiO <sub>2</sub> -9.6% | 0.15                             | 4.2      |
| Ag/AgCl@SiO <sub>2</sub> -14%  | 0.2                              | 5.5      |
